# Supplementary material for: iModMix: Integrative Module Analysis for Multi-omics Data
Source: PubMed Central journal article supplement — bioRxiv. 2025 May 14:2024.11.12.623208. Originally published 2024 Nov 15. Preprint. [Version 3] doi: 10.1101/2024.11.12.623208 (PMC11601443; doi:10.1101/2024.11.12.623208), 2025-05-14

## Supplementary Figure 1. Benchmarking results.

### Metabolomic abundance RC20 data

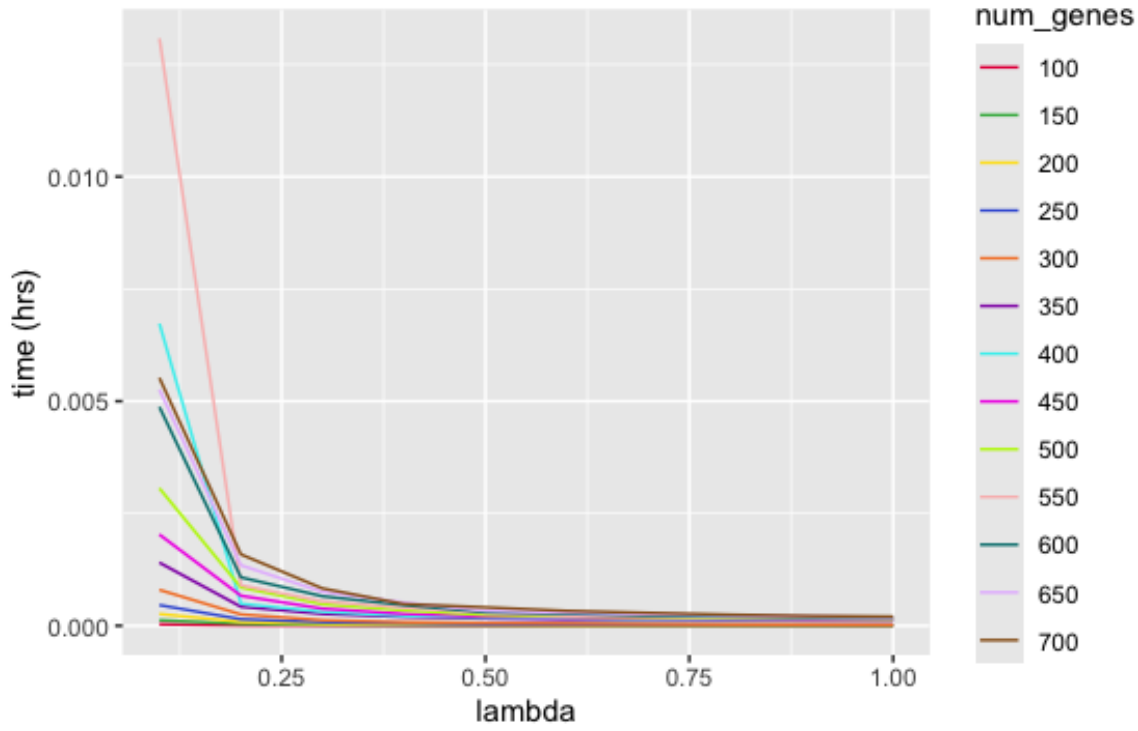

### Gene expression data lung adenocarcinoma mouse samples data

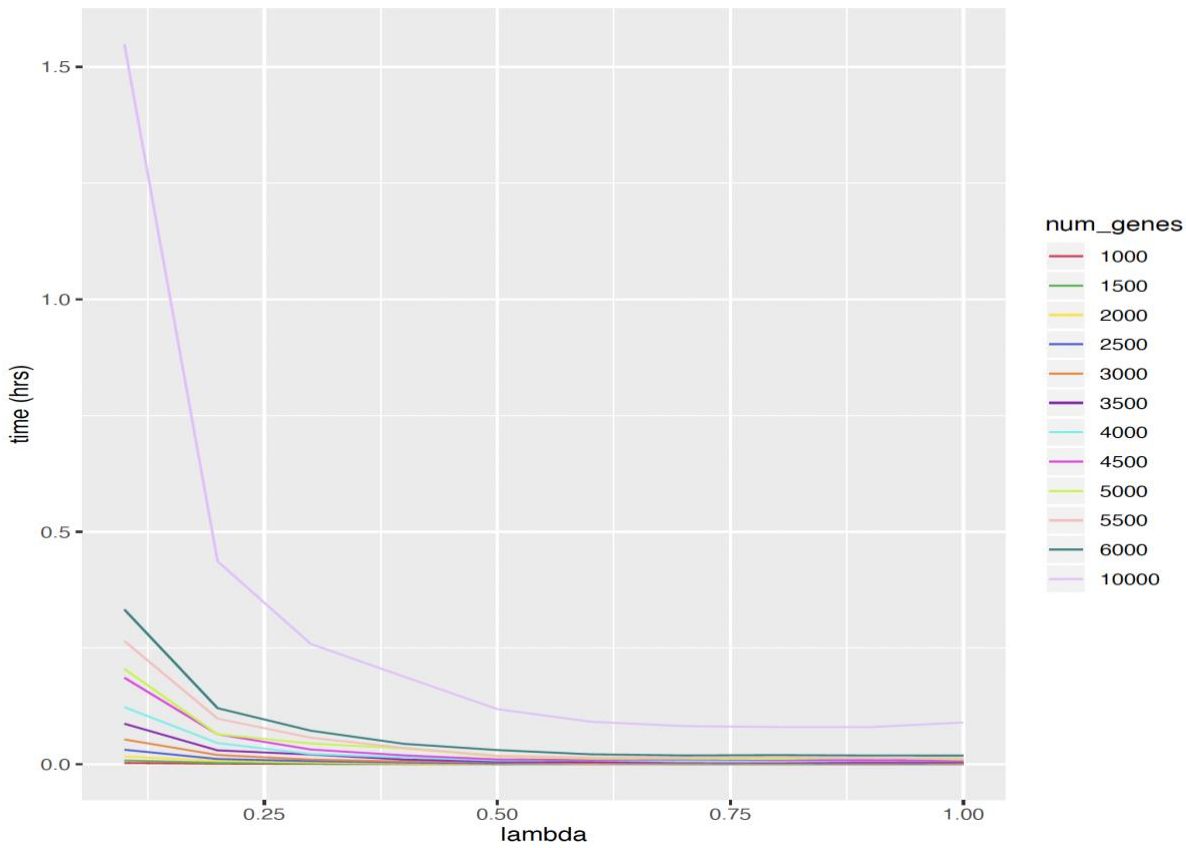

Supplement: NIHPP2024.11.12.623208v1-supplement-1.pdf [file NIHPP2024.11.12.623208v1-supplement-1.pdf]
